# Supplementary material
Source: Springer Nature journal article supplement (https://www.springermedizin.de/resource/supplementary/12990_2008_130_MOESM4_ESM.pdf/9612628)

# The Clear Picture

*Sensation*

*Cell  
body*

*Receptor  
Type*

*Stimuli*

**Touch**

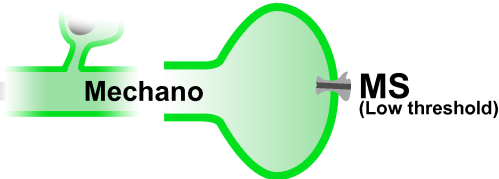

**Innocuous  
mechanical  
forces**

**Pain**

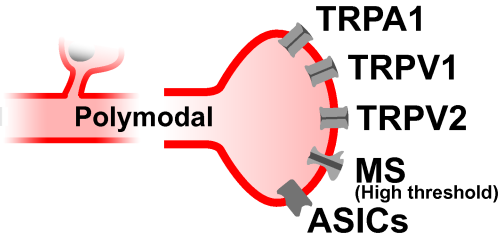

**Noxious  
stimuli**

( Strong mechanical  
forces,  $H^+$ ,  $K^+$ ,  
Endogenous &  
Exogenous Chemicals,  
Noxious Heat & Cold )

**Temp.**

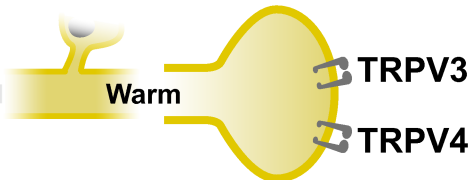

**Moderate  
temperature  
changes**

( Warming & Cooling )

**Temp.**

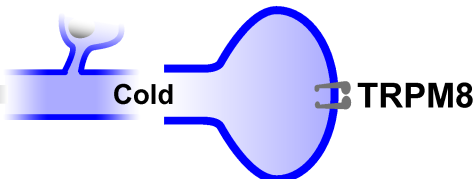

Supplement: MOESM4 [file 9612628]
